# Supplementary material for: Gel-assisted synthesis of oleate-modified Fe3O4@Ag composite microspheres as magnetic SERS probe for thiram detection
Source: Royal Society of Chemistry journal article supplement (doi:10.1039/c5ce01017a), 2015-01-01
Supplement: c5ce01017a1.pdf [file c5ce01017a1.pdf]

# Gel-assisted Synthesis of Oleate-modified Fe<sub>3</sub>O<sub>4</sub>@Ag Composite Microspheres as Magnetic SERS Probe for Thiram Detection

Haihong Zheng,<sup>a</sup> Bingfang Zou,<sup>\*ab</sup> Lin Chen,<sup>a</sup> Yongqiang Wang,<sup>\*a</sup> Xiaoli Zhang<sup>a</sup> and Shaomin Zhou<sup>a</sup>

5

## Supporting Information

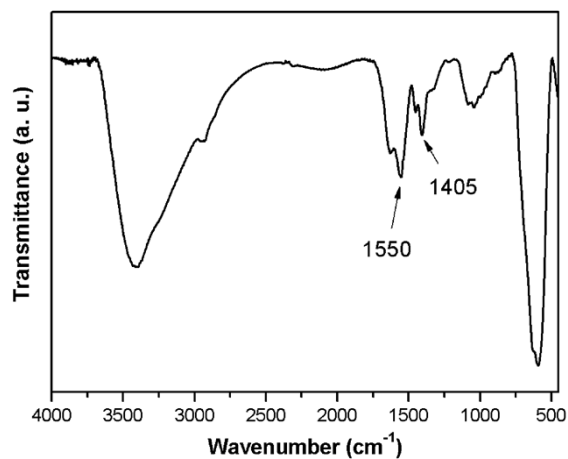

Fig. S1 FTIR spectrum of polyacrylate modified Fe<sub>3</sub>O<sub>4</sub> microspheres.

10

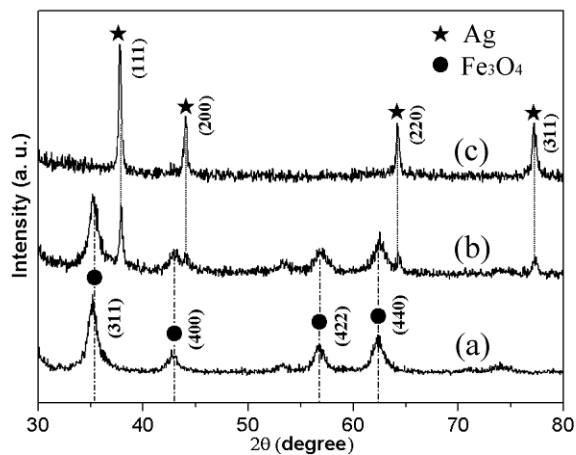

Fig. S2 XRD patterns of (a) Fe<sub>3</sub>O<sub>4</sub> microspheres, (b) Fe<sub>3</sub>O<sub>4</sub> microspheres with Ag seeds, and (c) Fe<sub>3</sub>O<sub>4</sub>@Ag composite microspheres.

15

20

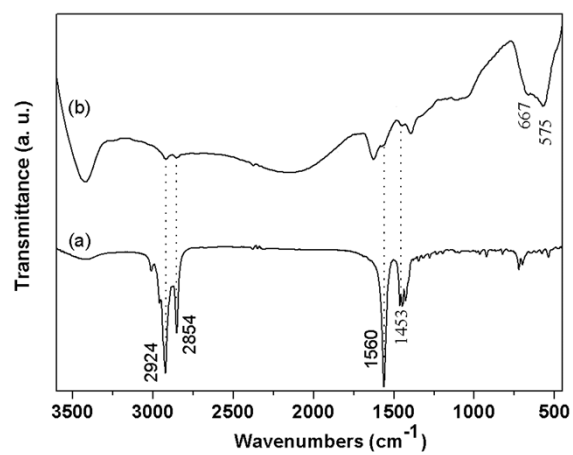

Fig. S3 FTIR spectra of (a)  $\text{Fe}_3\text{O}_4@Ag$  composite microspheres and (b) sodium oleate.

5

10

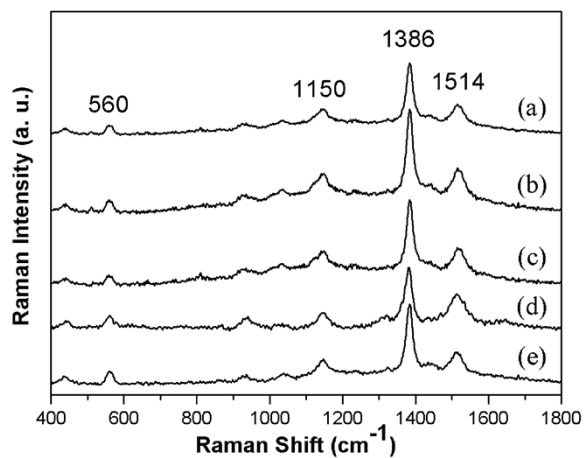

Fig. S4 SERS spectra collected from five different spots by using  $\text{Fe}_3\text{O}_4@Ag$  composite microspheres as SERS substrate.

15
